# Supplementary material
Source: publisher figshare collection journal article supplement (https://sage.figshare.com/ndownloader/files/16188329)
Supplement: Supplementary file 1 [file 16188329]

## **YAP-Induced Endothelial-Mesenchymal Transition in Oral Submucous Fibrosis**

J. Li, M. Yao, X. Zhu, Q. Li, J. He, L. Chen, W. Wang, C. Zhu, T. Shen, R. Cao, and C. Fang

### **Appendix**

#### **Supplementary Materials and Methods**

##### ***Immunohistochemical analysis***

For immunofluorescence staining, normal or OSF tissue sections were deparaffinized, rehydrated, and incubated with sodium citrate buffer (pH 6.0) for antigen retrieval. The sections were blocked with 3% hydrogen peroxide, and then incubated overnight at 4°C with the primary antibodies (Supplementary Table 2) to observe protein expression and localization. An anaplastic lymphoma kinase (ALK) staining kit (ZK-9600, Zhongshan Goldenbridge Biotechnology, Beijing, China) was used to visualize the sections. Hematoxylin was used to counterstain the sections, and photomicrographs were obtained for further analysis.

##### ***Protein extraction and analyses***

Total protein lysates were obtained using lysis buffer [radioimmunoprecipitation assay buffer (200 µL; 89901, Thermo Fisher Scientific), protease inhibitor cocktail (2 µL; B14001, Bimake), phosphatase inhibitor cocktail (2 µL; B15001, Bimake)]. Protein concentrations were detected using the bicinchoninic acid assay. Total protein lysates were resolved by 10% (w/v) SDS-PAGE, and transferred onto polyvinylidene fluoride membranes (Millipore). The membranes were blocked in 5% fresh skim milk and incubated overnight at 4°C in Tris-buffered saline with Tween 20 (TBST) + 5% bovine serum albumin (BSA) containing primary antibodies (Supplementary Table 2). The membranes were incubated with anti-rabbit, anti-mouse, or anti-goat peroxidase-conjugated secondary antibody at 37°C for 1 h according to the source of the primary antibody species. Immobilon

Western Chemiluminescent HRP Substrate (Millipore) was used to visualize the protein bands.

***RNA extraction, cDNA synthesis, and RT-PCR***

RNA was extracted from cells or tissues without epithelium using TRIzol (Thermo Fisher Scientific). RNA samples were reverse-transcribed to cDNA using a PrimeScript™ RT reagent Kit (RR074A, Takara). We performed real-time PCR on a C1000 Touch™ thermal cycler (Bio-Rad) with SYBR Green mix (Bio-Rad). The relative transcript levels were calculated using the comparative threshold cycle ( $\Delta\Delta CT$ ) method; the results were normalized to the expression of GAPDH. Supplementary Table 4 lists the PCR primer sequences.

**Supplementary Table 1.** Patients’ clinical characteristics

| Number  | Sex    | Age | Part                              | Smoking history     | Areca nut chewing history | Systemic disease history                            | Pathophysiology number | Disease stage | Purpose      |
|---------|--------|-----|-----------------------------------|---------------------|---------------------------|-----------------------------------------------------|------------------------|---------------|--------------|
| NOR1    | female | 21  | The buccal mucosa around 48 tooth | none                | none                      | none                                                | -                      | -             | IHC          |
| NOR2    | male   | 15  | The buccal mucosa around 38 tooth | none                | none                      | none                                                | -                      | -             | IHC          |
| NOR3    | female | 23  | The buccal mucosa around 48 tooth | none                | none                      | none                                                | -                      | -             | IHC          |
| NOR4    | female | 26  | The buccal mucosa around 48 tooth | none                | none                      | none                                                | -                      | -             | IHC          |
| NOR5    | female | 39  | Left lower lip mucosa             | none                | none                      | Hepatitis B (HBsAg, HBcAb, and HBcAb test positive) | -                      | -             | IHC          |
| NOR6    | female | 19  | The buccal mucosa around 48 tooth | none                | none                      | none                                                | -                      | -             | IHC          |
| NOR7    | female | 50  | The buccal mucosa around 48 tooth | none                | none                      | none                                                | -                      | -             | IHC          |
| NOR8    | female | 23  | The buccal mucosa around 18 tooth | none                | none                      | none                                                | -                      | -             | IHC          |
| NOR9    | female | 23  | The buccal mucosa around 48 tooth | none                | none                      | none                                                | -                      | -             | IHC          |
| NOR10   | female | 20  | The buccal mucosa around 38 tooth | none                | none                      | none                                                | -                      | -             | IHC          |
| NOR11   | female | 40  | The buccal mucosa around 38 tooth | none                | none                      | none                                                | -                      | -             | IHC          |
| NOR12   | male   | 25  | The buccal mucosa around 38 tooth | none                | none                      | none                                                | -                      | -             | IHC          |
| NOR13   | male   | 30  | The buccal mucosa around 38 tooth | none                | none                      | none                                                | -                      | -             | IHC          |
| NOR14   | male   | 31  | The buccal mucosa around 38 tooth | none                | none                      | none                                                | -                      | -             | IHC          |
| NOR15   | male   | 32  | The buccal mucosa around 38 tooth | none                | none                      | none                                                | -                      | -             | IHC          |
| NOR16   | female | 21  | The buccal mucosa around 48 tooth | none                | none                      | none                                                | -                      | -             | fresh-frozen |
| NOR17   | female | 19  | The buccal mucosa around 48 tooth | none                | none                      | none                                                | -                      | -             | fresh-frozen |
| NOR18   | female | 24  | The buccal mucosa around 48 tooth | none                | none                      | none                                                | -                      | -             | fresh-frozen |
| NOR19   | male   | 25  | The buccal mucosa around 38 tooth | none                | none                      | none                                                | -                      | -             | fresh-frozen |
| E-OSF1  | male   | 24  | right buccal mucosa               | 10/day, 5-6 years   | 2-3/day, 5 years          | none                                                | 20786                  | early phase   | IHC          |
| E-OSF2  | male   | 28  | left buccal mucosa                | 20/day, 3 years     | 5/day, 5 years            | none                                                | 20634                  | early phase   | IHC          |
| E-OSF3  | male   | 27  | right buccal mucosa               | 10/day, 2 years     | 3-4/day, 10 years         | none                                                | 20978                  | early phase   | IHC          |
| E-OSF4  | male   | 36  | right buccal mucosa               | 20/day, 10+ years   | 10/day, 5-6 years         | none                                                | 21388                  | early phase   | IHC          |
| E-OSF5  | male   | 63  | right buccal mucosa               | 20/day, 30-40 years | 10/day, 10+ years         | hypertension                                        | 20393                  | early phase   | IHC          |
| E-OSF6  | male   | 43  | left buccal mucosa                | 20/day, 20 years    | 5/day, 10 years           | none                                                | 22107                  | early phase   | IHC          |
| E-OSF7  | male   | 51  | right buccal mucosa               | 20/day, 20 years    | 10/day, 5 years           | none                                                | 979579                 | early phase   | IHC          |
| E-OSF8  | male   | 60  | right tongue mucosa               | 20/day, 30 years    | 10/day, 30 years          | none                                                | 1182350                | early phase   | IHC          |
| E-OSF9  | male   | 26  | right buccal mucosa               | none                | 1-2/day, 1 year           | none                                                | 982804                 | early phase   | IHC          |
| E-OSF10 | male   | 30  | right buccal mucosa               | 10/day, 2 years     | 10/day, 7 years           | none                                                | 981141                 | early phase   | IHC          |
| E-OSF11 | male   | 25  | right buccal mucosa               | none                | 5/day, 10 years           | none                                                | 959031                 | early phase   | IHC          |
| E-OSF12 | male   | 31  | left buccal mucosa                | 10/day, 5 years     | 10/day, 5 years           | none                                                | 993090                 | early phase   | IHC          |
| E-OSF13 | male   | 41  | right buccal mucosa               | 20/day, 10 years    | 10-20/day, 10+ years      | none                                                | 1070601                | early phase   | IHC          |
| E-OSF14 | male   | 54  | left buccal mucosa                | 40/day, 20+ years   | 10/day, 10 years          | hypertension                                        | 937611                 | early phase   | IHC          |
| E-OSF15 | male   | 41  | left buccal mucosa                | 20/day, 20 years    | 10/day, 10 years          | none                                                | 945379                 | early phase   | IHC          |
| E-OSF16 | male   | 27  | left buccal mucosa                | 5/day, 1 years      | 5/day, 10 years           | none                                                | 949331                 | early phase   | fresh-frozen |
| E-OSF17 | male   | 36  | left buccal mucosa                | 20/day, 7 years     | 10/day, 10+ years         | none                                                | 962412                 | early phase   | fresh-frozen |
| E-OSF18 | male   | 36  | right buccal mucosa               | 20/day, 10 years    | 5-6/day, 5 years          | none                                                | 9978443                | early phase   | fresh-frozen |

|          |      |    |                     |                   |                      |              |        |                   |              |
|----------|------|----|---------------------|-------------------|----------------------|--------------|--------|-------------------|--------------|
| E-OSF19  | male | 35 | left buccal mucosa  | 10/day, 5 years   | 10/day, 10 years     | none         | 21175  | early phase       | fresh-frozen |
| E-OSF20  | male | 43 | left buccal mucosa  | 20/day, 10 years  | 10/day, 20 years     | none         | 21092  | early phase       | fresh-frozen |
| E-OSF21  | male | 36 | left buccal mucosa  | 20/day, 6 years   | 10/day, 5 years      | none         | 21689  | early phase       | fresh-frozen |
| ML-OSF1  | male | 27 | right buccal mucosa | none              | 10/day, 10+ years    | none         | 21417  | middle-late phase | IHC          |
| ML-OSF2  | male | 50 | right buccal mucosa | 40/day, 30 years  | 20/day, 30 years     | none         | 20781  | middle-late phase | IHC          |
| ML-OSF3  | male | 39 | left buccal mucosa  | 20/day, 10 years  | 10-20/day, 10+ years | none         | 20460  | middle-late phase | IHC          |
| ML-OSF4  | male | 43 | right buccal mucosa | none              | 20-30/day, 20+ years | none         | 20679  | middle-late phase | IHC          |
| ML-OSF5  | male | 38 | left buccal mucosa  | 10/day, 10 years  | 10/day, 20 years     | none         | 20380  | middle-late phase | IHC          |
| ML-OSF6  | male | 26 | right buccal mucosa | none              | 20/day, 7 years      | none         | 20694  | middle-late phase | IHC          |
| ML-OSF7  | male | 57 | right buccal mucosa | 40/day, 20+ years | 30/day, 30 years     | hypertension | 21262  | middle-late phase | IHC          |
| ML-OSF8  | male | 25 | right buccal mucosa | 5/day, 1 years    | 20/day, 5 years      | none         | 21654  | middle-late phase | IHC          |
| ML-OSF9  | male | 36 | left buccal mucosa  | 20/day, 10 years  | 20-30/day, 10 years  | none         | 20915  | middle-late phase | IHC          |
| ML-OSF10 | male | 49 | left buccal mucosa  | 20/day, 20 years  | 10/day, 20 years     | none         | 20557  | middle-late phase | IHC          |
| ML-OSF11 | male | 29 | left buccal mucosa  | none              | 10/day, 10 years     | none         | 20782  | middle-late phase | IHC          |
| ML-OSF12 | male | 22 | right buccal mucosa | none              | 3-4/day, 7years      | none         | 20788  | middle-late phase | IHC          |
| ML-OSF13 | male | 20 | right buccal mucosa | 10/day, 3 years   | 10/day, 3 years      | none         | 991144 | middle-late phase | IHC          |
| ML-OSF14 | male | 39 | right buccal mucosa | 20/day, 10 years  | 20/day, 10 years     | none         | 936727 | middle-late phase | IHC          |
| ML-OSF15 | male | 32 | right buccal mucosa | 20/day, 6 years   | 10/day, 6 years      | none         | 992609 | middle-late phase | IHC          |
| ML-OSF16 | male | 32 | right buccal mucosa | none              | 10/day, 10 years     | none         | 980303 | middle-late phase | fresh-frozen |
| ML-OSF17 | male | 20 | right buccal mucosa | none              | 3-4/day, 3 years     | none         | 958907 | middle-late phase | fresh-frozen |
| ML-OSF18 | male | 34 | right buccal mucosa | 10/day, 5 years   | 10/day, 5 years      | none         | 958305 | middle-late phase | fresh-frozen |
| ML-OSF19 | male | 39 | right buccal mucosa | 20/day, 7 years   | 20/day, 10+ years    | none         | 962930 | middle-late phase | fresh-frozen |
| ML-OSF20 | male | 30 | right buccal mucosa | 20/day, 5 years   | 20/day, 5 years      | none         | 23840  | middle-late phase | fresh-frozen |
| ML-OSF21 | male | 39 | right buccal mucosa | 20/day, 10 years  | 10/day, 10 years     | none         | 23838  | middle-late phase | fresh-frozen |
| ML-OSF22 | male | 30 | right buccal mucosa | 10/day, 4 years   | 10/day, 4 years      | none         | 23852  | middle-late phase | fresh-frozen |

**Supplementary Table 2.** List of primary antibodies

For immunofluorescence staining

| <b>Antibody</b> | <b>Product information</b>                         | <b>Dilution</b> |
|-----------------|----------------------------------------------------|-----------------|
| N-cadherin      | ab18203, Abcam, Cambridge, UK                      | 1:1000          |
| Vimentin        | ab8978, Abcam, Cambridge, UK                       | 1:1000          |
| $\alpha$ -SMA   | ab5694, Abcam, Cambridge, UK                       | 1:200           |
| YAP             | 14074S, Cell Signaling Technology, Boston, MA, USA | 1:200           |

For western blotting

| <b>Antibody</b>   | <b>Product information</b>                         | <b>Dilution</b> |
|-------------------|----------------------------------------------------|-----------------|
| N-cadherin        | ab18203, Abcam, Cambridge, UK                      | 1:1000          |
| E-cadherin        | 3195, Cell Signaling Technology, Boston, MA, USA   | 1:1000          |
| Vimentin          | ab8978, Abcam, Cambridge, UK                       | 1:1000          |
| $\alpha$ -SMA     | ab5694, Abcam, Cambridge, UK                       | 1:500           |
| PERK              | sc-9481, Santa Cruz, TX, USA                       | 1:1000          |
| p-PERK            | sc-32577, Santa Cruz, TX, USA                      | 1:1000          |
| p-eIF2 $\alpha$   | 3398, Cell Signaling Technology, Boston, MA, USA   | 1:1000          |
| ATF4              | 11815S, Cell Signaling Technology, Boston, MA, USA | 1:1000          |
| YAP               | 14074S, Cell Signaling Technology, Boston, MA, USA | 1:1000          |
| IRE1              | 27528-1-AP, Proteintech, Rosemont, USA             | 1:500           |
| ATF6              | 24169-1-AP, Proteintech, Rosemont, USA             | 1:1000          |
| MST1              | #14946, Cell Signaling Technology, Boston, MA, USA | 1:1000          |
| SAV1              | #13301, Cell Signaling Technology, Boston, MA, USA | 1:1000          |
| LATS1             | #3477, Cell Signaling Technology, Boston, MA, USA  | 1:400           |
| p-LATS1           | #8654, Cell Signaling Technology, Boston, MA, USA  | 1:300           |
| MOB1              | #13730, Cell Signaling Technology, Boston, MA, USA | 1:1000          |
| p-YAP             | #13008, Cell Signaling Technology, Boston, MA, USA | 1:1000          |
| $\alpha$ -tubulin | sc-23948, Santa Cruz, TX, USA                      | 1:4000          |
| GAPDH             | sc-137179, Santa Cruz, TX, USA                     | 1:2000          |

For immunocytochemistry

| Antibody | Product information                                | Dilutions |
|----------|----------------------------------------------------|-----------|
| YAP      | 14074S, Cell Signaling Technology, Boston, MA, USA | 1:100     |
| TOMM20   | ab186734, Abcam, Cambridge, UK                     | 1:250     |

**Supplementary Table 3.** The YAP siRNA constructs used

| Number | Sequence              |
|--------|-----------------------|
| #1     | GGUGAUACUAUCAACCAAATT |
| #2     | GACAUCUUCUGGUCAGAGATT |

**Supplementary Table 4.** Primers used for RT-PCR

For human

| <b>Target</b> | <b>Forward primer</b>  | <b>Reverse primer</b>   |
|---------------|------------------------|-------------------------|
| <i>CTGF</i>   | CAGCATGGACGTTCGTCTG    | AACCACGGTTTGGTCCTTGG    |
| <i>CYR61</i>  | CCCATTCCAGGGTTTGAGC    | TGCACGAAGAGGTGTTTGTTG   |
| <i>COL1A2</i> | GTTGCTGCTTGCAGTAACCTT  | AGGGCCAAGTCCAACCTCCTT   |
| <i>COL3A1</i> | GGAGCTGGCTACTTCTCGC    | GGGAACATCCTCCTTCAACAG   |
| <i>CDH2</i>   | TCAGGCGTCTGTAGAGGCTT   | ATGCACATCCTTCGATAAGACTG |
| <i>CDH1</i>   | CGAGAGCTACACGTTACGG    | GGGTGTCGAGGGAAAAATAGG   |
| <i>SNAIL</i>  | TCGGAAGCCTAACTACAGCGA  | AGATGAGCATTGGCAGCGAG    |
| <i>MMP1</i>   | AAAATTACACGCCAGATTGCC  | GGTGTGACATTACTCCAGAGTTG |
| <i>MMP9</i>   | TGTACCGCTATGGTTACACTCG | GGCAGGGACAGTTGCTTCT     |
| <i>GAPDH</i>  | GGAGCGAGATCCCTCCAAAAT  | GGCTGTTGTCATACTTCTCATGG |

For mice

| <b>Target</b> | <b>Forward primer</b>  | <b>Reverse primer</b>   |
|---------------|------------------------|-------------------------|
| <i>Col1a2</i> | AGGTCGGTGTGAACGGATTTG  | GGGGTCGTTGATGGCAACA     |
| <i>Col3a1</i> | CTGTAACATGGAACTGGGGAAA | CCATAGCTGAACTGAAAACCACC |
| <i>Cdn1</i>   | CAGTTCCGAGGTCTACACCTT  | TGAATCGGGAGTCTTCCGAAAA  |
| <i>Snail</i>  | CACACGCTGCCTTGTGTCT    | GGTCAGCAAAAGCACGGTT     |
| <i>Mmp9</i>   | GCAGAGGCATACTTGTACCG   | TGATGTTATGATGGTCCCCTTG  |
| <i>Gapdh</i>  | AGGTCGGTGTGAACGGATTTG  | GGGGTCGTTGATGGCAACA     |





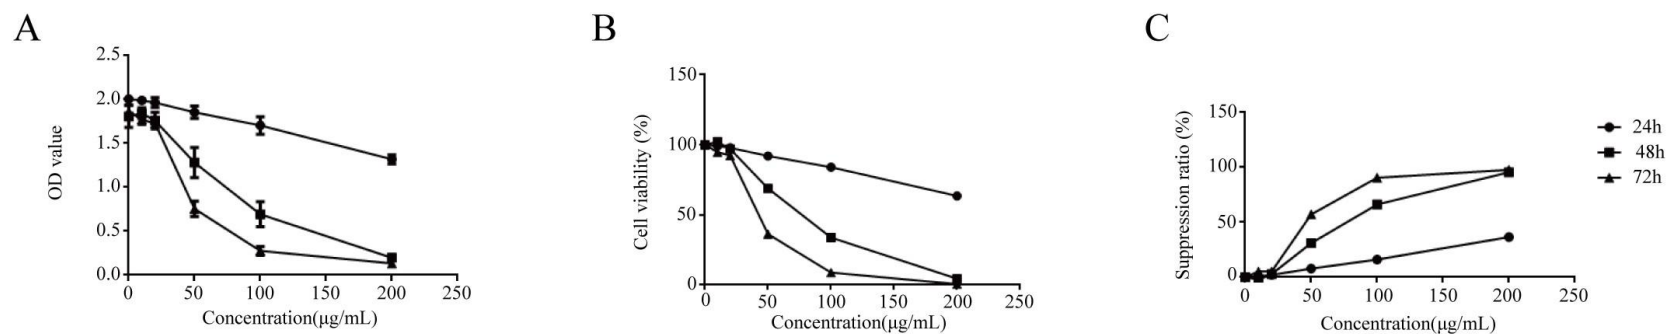

**Fig. M1. Arecoline affects HUVEC proliferation.** Cell Counting Kit-8 (CCK-8) was used to the effects of arecoline on the HUVEC proliferation, (A) optical density (OD) value, (B) cell viability, and (C) suppression ratio. The results indicated that high concentrations of arecoline inhibited cell proliferation, and that the optimal concentration was 10  $\mu\text{g/mL}$ .

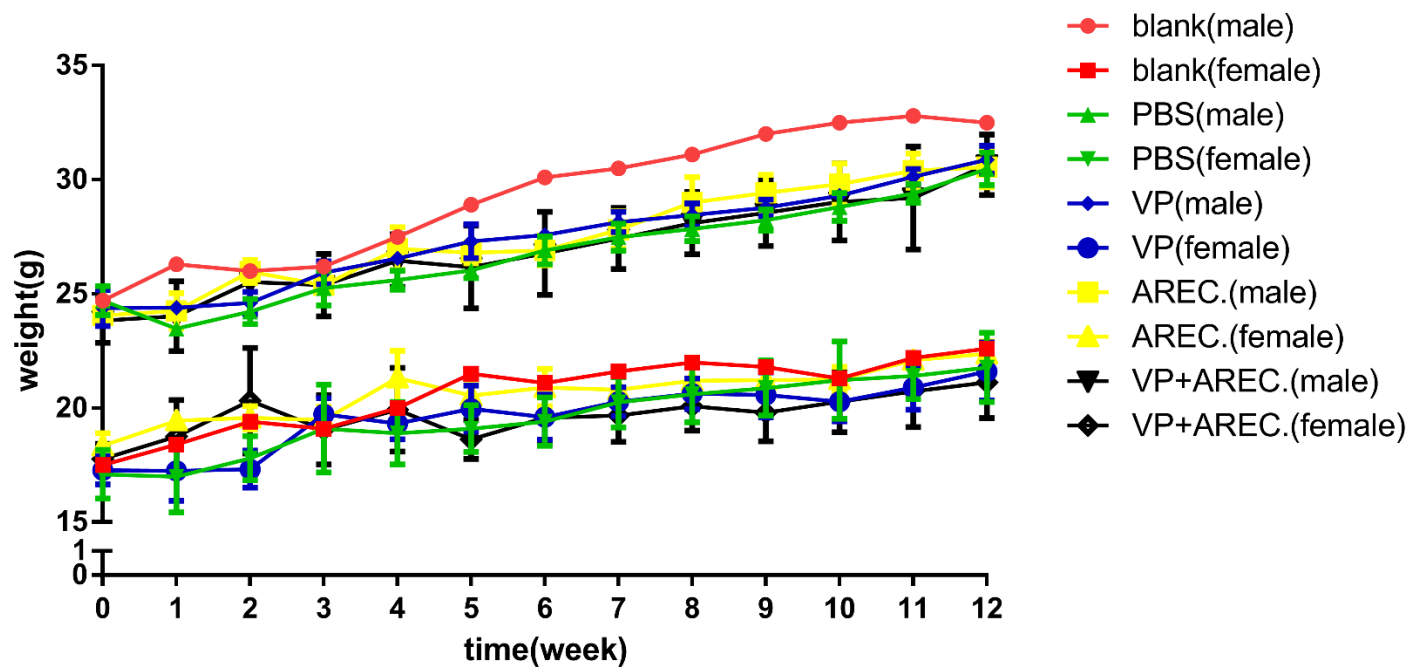

Fig. M2. The growth curves of mice in each group.

A

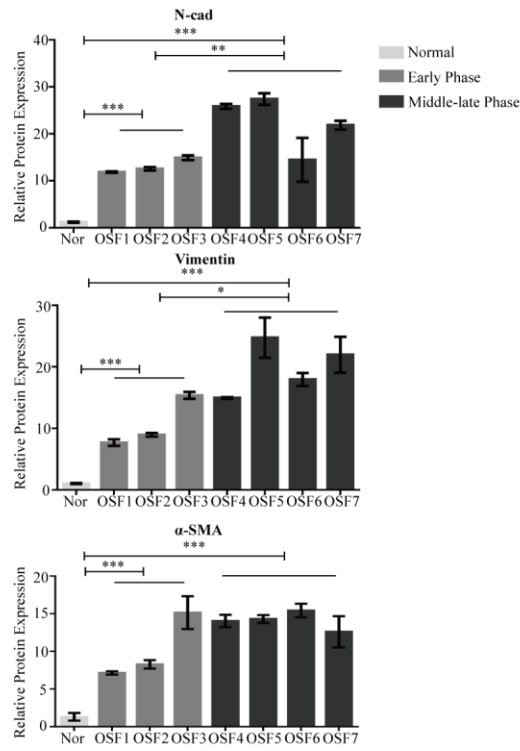

B

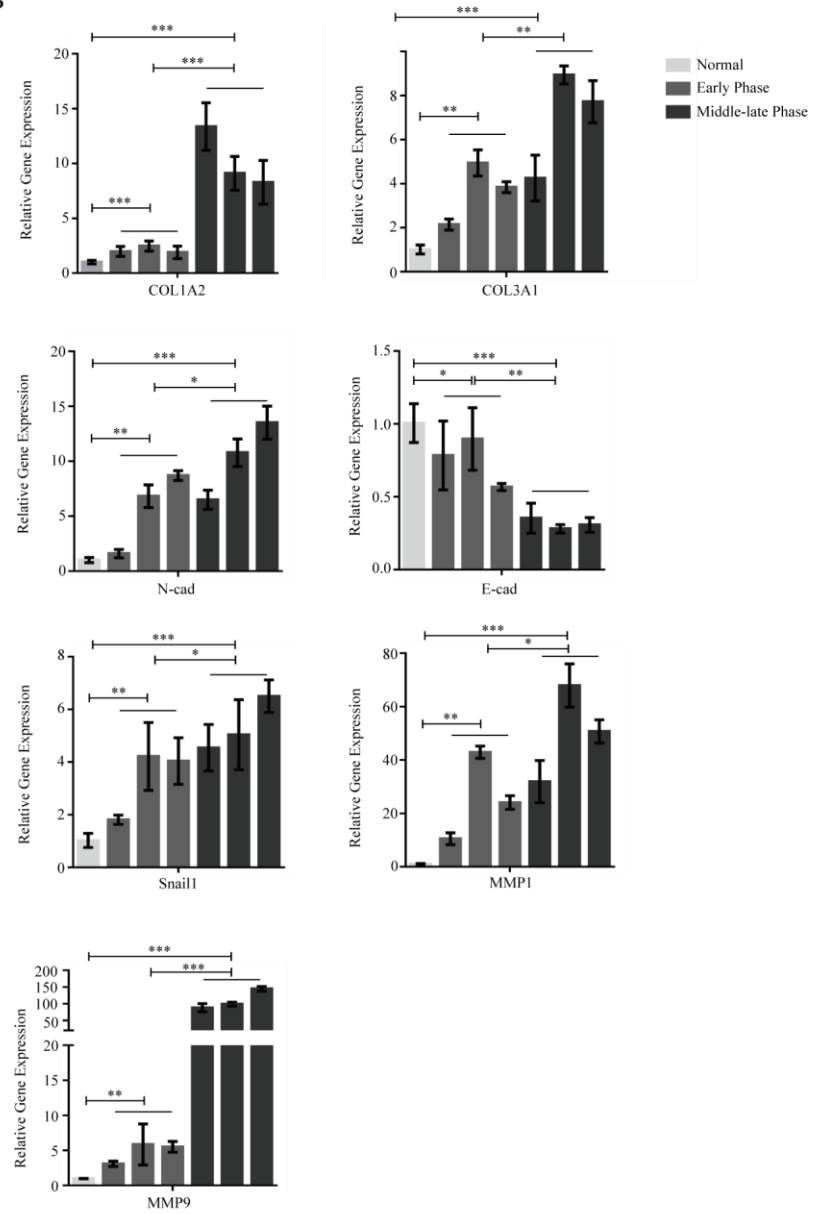

**Fig. S1. Microvascular changes and EndMT were present in human OSF tissues, Related to Fig. 1.** (A) Densitometric analysis for Fig. 1B with ImageJ. The experiment was repeated 3 times independently. Results shown are the mean  $\pm$  SD. ANOVA, n = 8. \*P < 0.05. \*\*P < 0.01. \*\*\*P < 0.001. (B) RT-qPCR for COL1A2, COL3A1, N-cadherin, E-cadherin, Snail, MMP1, and MMP9 in OSF tissues vs. normal tissues. The experiment was repeated 3 times independently. Results are shown as mean  $\pm$  SD. ANOVA, n = 7. \*P < 0.05. \*\*P < 0.01. \*\*\*P < 0.001. ANOVA, analysis of variance; COL1A2, type I collagen; COL3A1, type III collagen; EndMT, endothelial-mesenchymal transformation; MMP1, matrix metalloproteinase 1; MMP9, matrix metalloproteinase 9; OSF, oral submucous fibrosis; RT-qPCR, reverse transcription quantitative polymerase chain reaction.

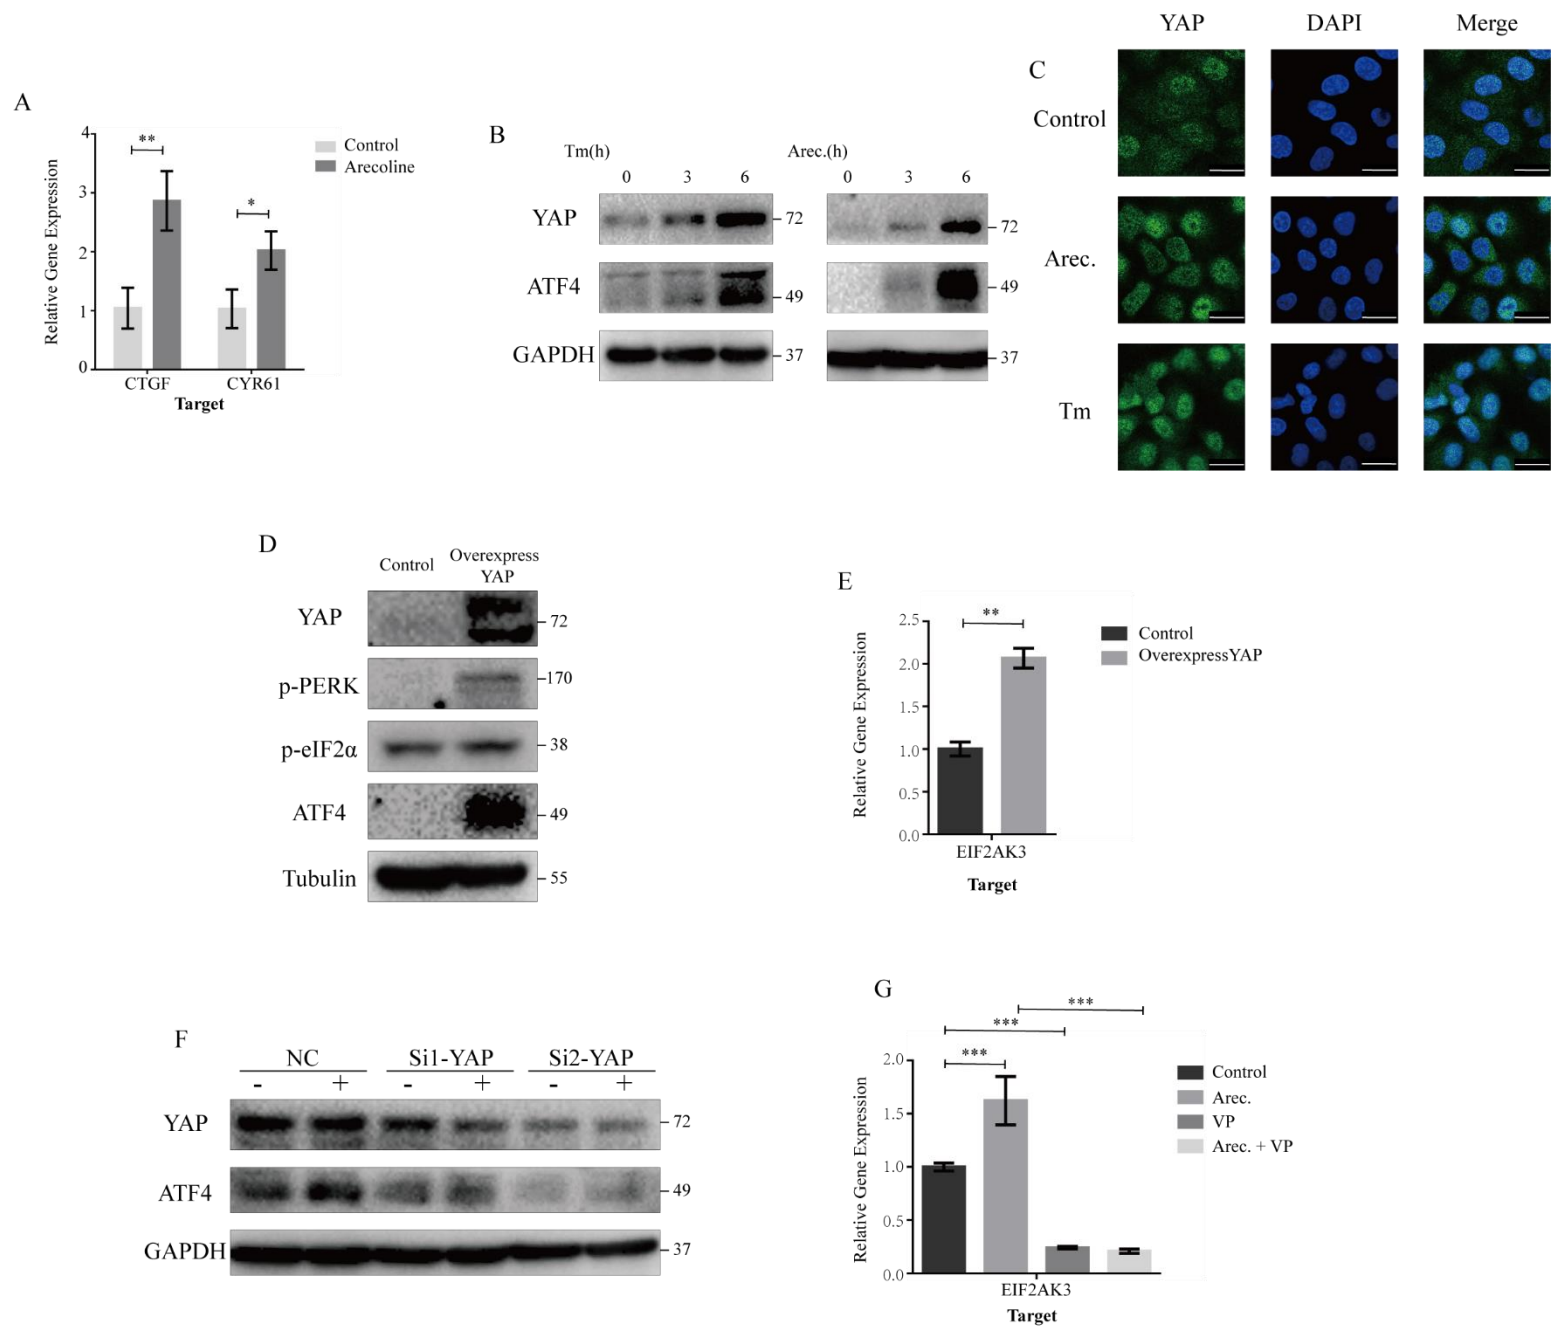

**Fig. S2 Arecoline activated YAP via the PERK pathway in endothelial cells, Related to Fig. 2. (A)** RT-qPCR for CTGF and CYR61 in HUVECs

treated with arecoline for 6 h. The experiment was repeated 3 times independently. Results are shown as mean  $\pm$  SD. *t* test. \**P* < 0.05. \*\**P* < 0.01. (B) Western blots of YAP and ATF4 in HUVECs treated with Tm or arecoline for 0, 3, or 6 h. (C) Fluorescent staining for YAP in Tm- vs. arecoline-treated HUVECs (FCFM,  $\times 630$  magnification, scale bar = 25  $\mu$ m). (D, E) Western blots of PERK, p-PERK, p-eIF2 $\alpha$ , ATF4, and YAP and RT-qPCR of *EIF2AK3* in YAP overexpression HUVECs vs. control. The experiment was repeated 3 times independently. Results are shown as mean  $\pm$  SD. *t* test. \*\**P* < 0.01. (F) Western blots of YAP and ATF4 following YAP RNA interference in arecoline-treated HUVECs. (G) RT-qPCR of *EIF2AK3* following VP pretreatment in HUVECs treated with arecoline for 6 h vs. untreated HUVECs. The experiment was repeated 3 times independently. Results are shown as mean  $\pm$  SD. ANOVA. \*\*\**P* < 0.001. ER, endoplasmic reticulum; FCFM, fibered confocal fluorescence microscopy; HUVEC, human umbilical vein endothelial cell; RT-qPCR, reverse transcription quantitative polymerase chain reaction; Tm, tunicamycin; VP, verteporfin; YAP, Yes-associated protein;

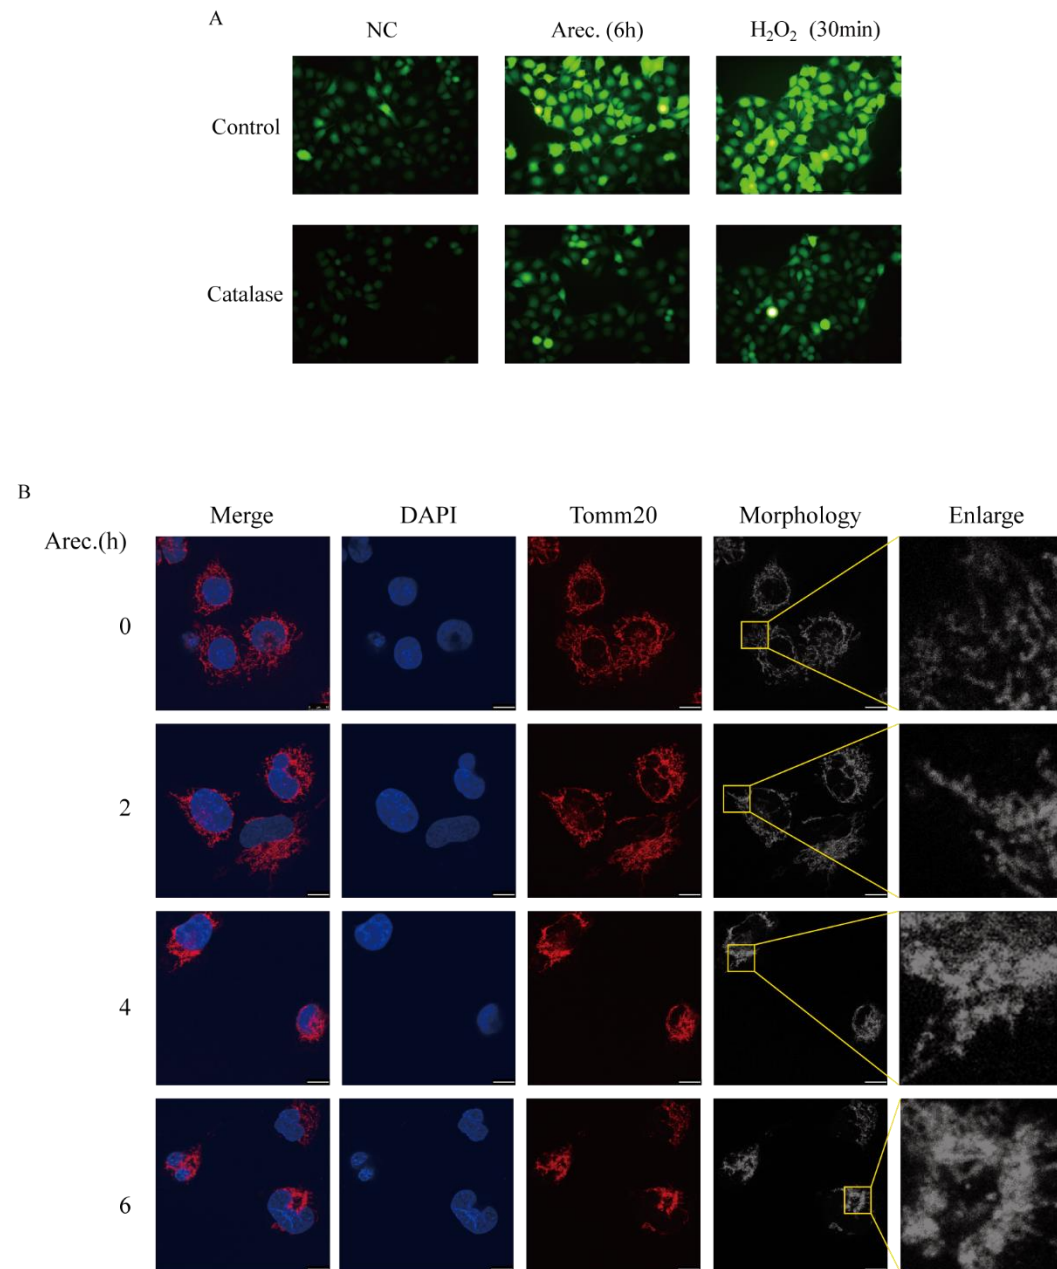

**Fig. S3 ROS was required for PERK-induced YAP activation, Related to Fig 3. (A)** Fluorescent staining for ROS after catalase pretreatment in



HUVECs treated with arecoline and H<sub>2</sub>O<sub>2</sub> vs. the control (×400 magnification). (B) Fluorescent staining for TOMM20 in HUVECs treated with arecoline for 2, 4, or 6 h (FCFM, ×1,500 magnification; scale bar = 10 μm). FCFM, fibered confocal fluorescence microscopy; HUVEC, human umbilical vein endothelial cell; ROS, reactive oxygen species; YAP, Yes-associated protein.

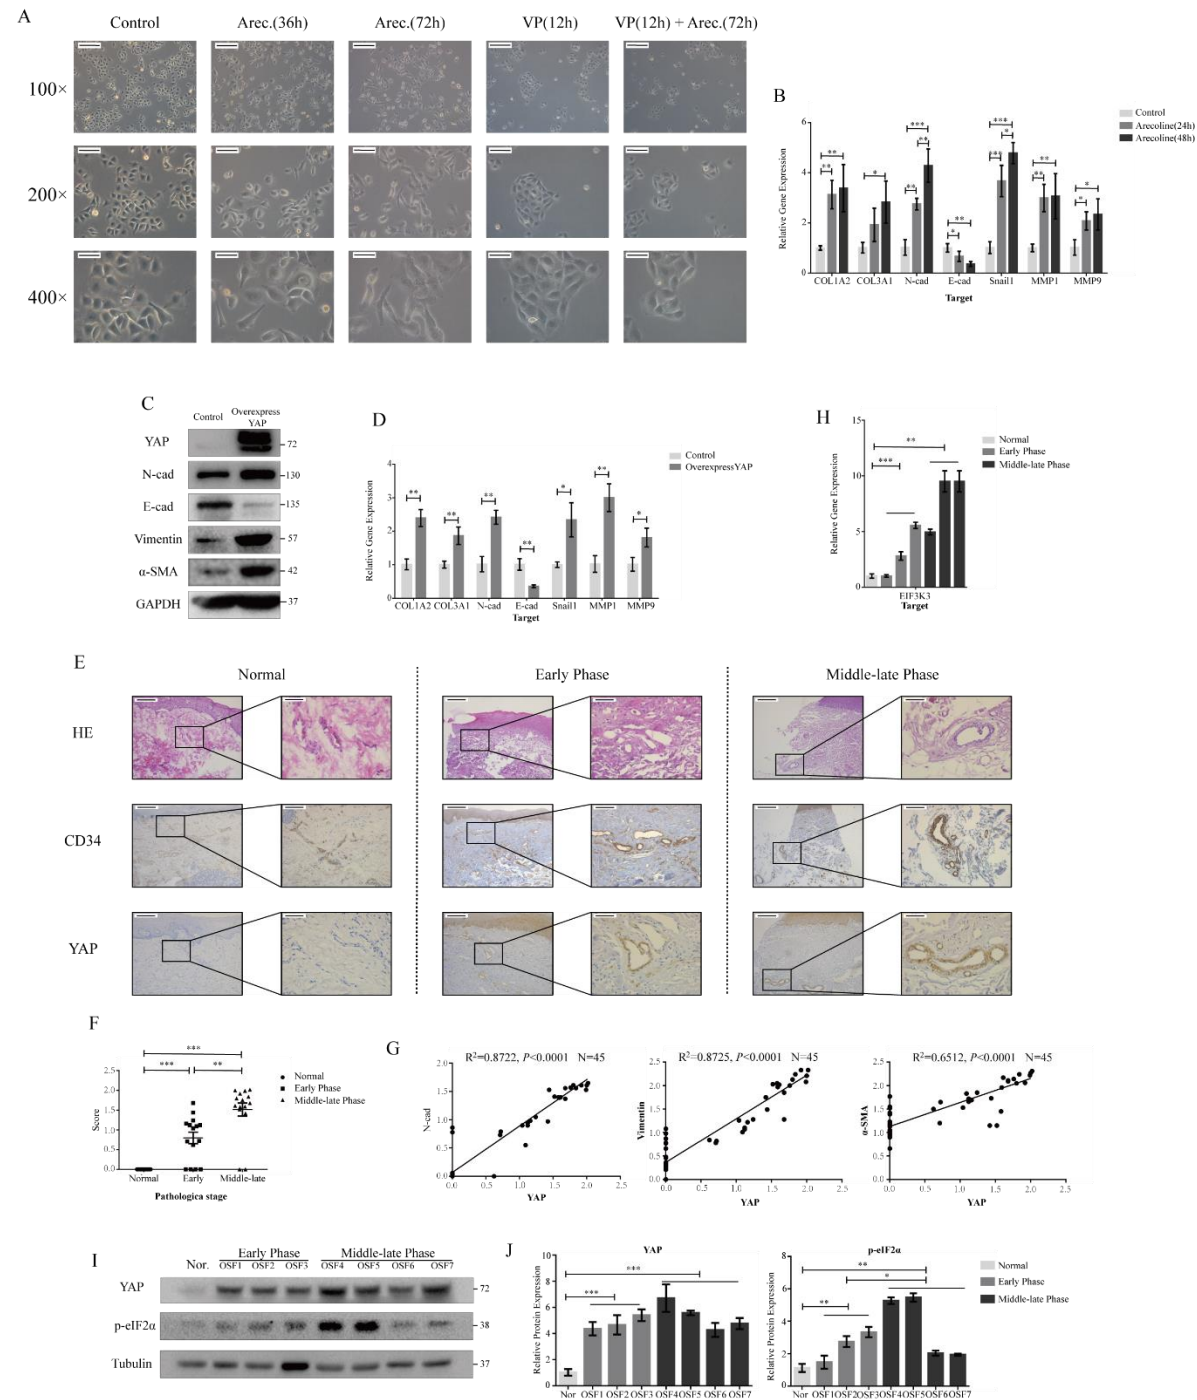

**Fig S4 YAP mediated arecoline-induced EndMT, Related to Fig. 4. (A) Cellular morphology changes of HUVECs treated with arecoline for 0, 48,**

or 72 h following VP pretreatment (top,  $\times 100$  magnification [scale bar = 200  $\mu\text{m}$ ]; middle,  $\times 200$  magnification [scale bar = 100  $\mu\text{m}$ ]; bottom,  $\times 400$  magnification [scale bar = 50  $\mu\text{m}$ ]). (B) RT-qPCR for COL1A2, COL3A1, N-cadherin, E-cadherin, Snail, MMP1, and MMP9 in HUVECs treated with arecoline for 0, 24, or 48 h. The experiment was repeated 3 times independently. Results are shown as mean  $\pm$  SD. ANOVA.  $*P < 0.05$ .  $**P < 0.01$ .  $***P < 0.001$ . (C, D) Western blot of N-cadherin, E-cadherin, vimentin, and  $\alpha$ -SMA, and RT-qPCR for COL1A2, COL3A1, N-cadherin, E-cadherin, Snail, MMP1, and MMP9 in YAP overexpression HUVECs compared with control. The experiment was repeated 3 times independently. Results are shown as mean  $\pm$  SD. t test.  $*P < 0.05$ .  $**P < 0.01$ . (E) HE and immunohistochemical staining for CD34 and YAP in OSF tissues vs. normal tissues (left,  $\times 100$  magnification [scale bar = 200  $\mu\text{m}$ ]; right,  $\times 400$  magnification [scale bar = 50  $\mu\text{m}$ ]). (F) The immunoreactive score. (G) Correlation analysis between YAP and N-cadherin, vimentin, and  $\alpha$ -SMA. (H) RT-qPCR for EIF2AK3 in OSF tissues vs. normal tissues. The experiment was repeated 3 times independently. Results are shown as mean  $\pm$  SD. ANOVA,  $n = 7$ .  $*P < 0.05$ .  $**P < 0.01$ .  $***P < 0.001$ . (I) Western blots of YAP and p-eIF2 $\alpha$  in OSF tissues vs. normal tissues. (J) densitometric analysis using ImageJ. The experiment was repeated 3 times independently. Results are shown as mean  $\pm$  SD. ANOVA,  $n = 8$ .  $*P < 0.05$ .  $**P < 0.01$ .  $***P < 0.001$ .  $\alpha$ -SMA,  $\alpha$ -smooth muscle actin; ANOVA, analysis of variance; COL1A2, type I collagen; COL3A1, type III collagen; EndMT, endothelial-mesenchymal transformation; HUVEC, human umbilical vein endothelial cell; MMP1, matrix metalloproteinase 1; MMP9, matrix metalloproteinase 9; OSF, oral submucous fibrosis; RT-qPCR, reverse transcription quantitative polymerase chain reaction; VP, verteporfin; YAP, Yes-associated protein.

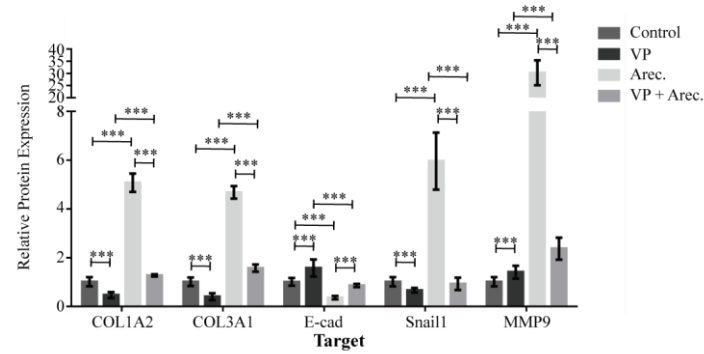

**Fig. S5 VP treated arecoline-induced OSF in mice, Related to Fig. 5.** RT-qPCR for Col1a2, Col3a1, E-cadherin, Snail1, and Mmp9 in mouse tissues. The experiment was repeated 3 times independently. Results are shown as mean  $\pm$  SD. ANOVA,  $n = 32$ . \*\*\* $P < 0.001$ .  $\alpha$ -SMA,  $\alpha$ -smooth muscle actin; ANOVA, analysis of variance; Col1a2, type I collagen; Col3a1, type III collagen; Mmp9, matrix metalloproteinase 9; RT-qPCR, reverse transcription quantitative polymerase chain reaction; VP, verteporfin.
